# Supplementary material for: Mechanistic and kinetic studies on biodiesel production catalyzed by an efficient pyridinium based ionic liquid
Source: Royal Society of Chemistry journal article supplement (doi:10.1039/c5gc00976f), 2015-01-01
Supplement: c5gc00976f1.pdf [file c5gc00976f1.pdf]

## Electronic Supplementary Information

### Mechanistic and kinetic study for biodiesel production catalyzed by an efficient pyridinium based ionic liquid

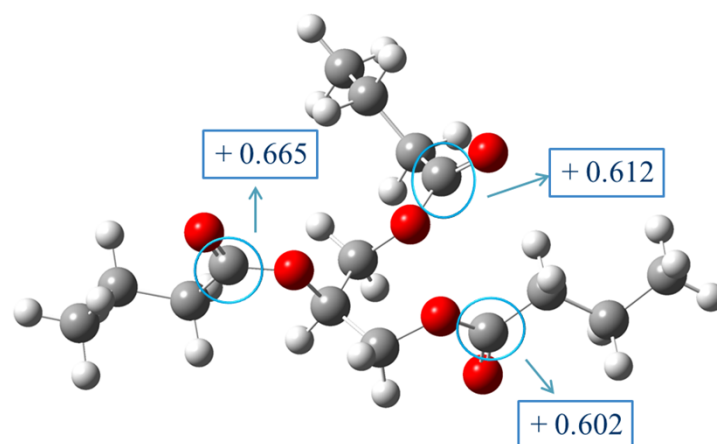

Fig.S1 Geometry of optimized TG molecule with Mulliken charge distribution on the carbonyl carbon

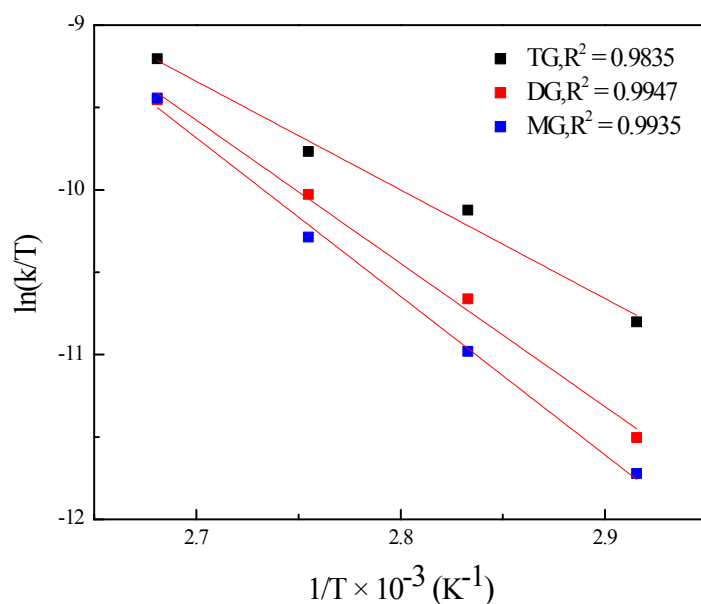

Fig. S2 Kinetics plot of  $\ln(k/T)$  vs.  $1/T$  for the pyridinium-IL catalyzed transesterification, the slope represents  $[-\Delta H/R]$  and the intercept represents  $[\ln(kB/h)+\Delta S/R]$  in the Eyring equation respectively.
